# Supplementary material for: Eradication of Biofilm-Mediated Methicillin-Resistant Staphylococcus aureus Infections In Vitro: Bacteriophage-Antibiotic Combination
Source: PubMed Central journal article supplement (PMC9045164; doi:10.1128/spectrum.00411-22), 2022-03-29
Supplement: spectrum00411-22_supp_1_seq12.pdf [file spectrum00411-22_supp_1_seq12.pdf]

## Supplementary Material

**Table.1S:** List of pair strains with their EOP to Sb-1 and their MIC values.

| Isolate      | Phenotype | Strain Type | EOP      |                  | MIC   |      |
|--------------|-----------|-------------|----------|------------------|-------|------|
|              |           |             | Sb-1     | VAN <sup>2</sup> | DAP   | CPT  |
| <b>D712</b>  | DNS-VISA  | USA100/ST5  | 1        | 4                | 4     | 0.5  |
| <b>D592</b>  | hVISA     | USA100/ST5  | 0.869855 | 2                | 0.5   | 2    |
| <b>8015</b>  | DNS-VISA  | USA100/ST5  | 0.946242 | 4                | 4     | 1    |
| <b>8014</b>  | MRSA      | USA100/ST5  | 0.893186 | 2                | 0.5   | 1    |
| <b>684</b>   | DNS       | USA100/ST5  | 1.206012 | 2                | 4,2   | 0.5  |
| <b>675</b>   | MRSA      | USA100/ST5  | 1.174767 | 0.5              | <0.13 | 0.5  |
| <b>JH9</b>   | VISA      | USA100/ST5  | 1.015945 | 8                | 1     | 0.5  |
| <b>JH1</b>   | VSSA      | USA100/ST5  | 1.028677 | 1                | 0.25  | 0.25 |
| <b>306</b>   | DNS-VISA  | USA300/ST8  | 1.039276 | 4,2              | 4     | 0.5  |
| <b>305</b>   | MRSA      | USA300/ST8  | 1.015945 | 1                | 0.25  | 0.5  |
| <b>R6913</b> | VISA      | USA100/ST5  | 1.02263  | 8                | 4     | 1    |
| <b>R6911</b> | hVISA     | USA100/ST5  | 1.039276 | 2                | 2     | 1    |

**Table 2S.** Experimental design for various propagation method

| <b>Experiment details (CFU and PFU are at time of phage addition)</b>                                                                                                     | <b>MOI/phage quantity</b> | <b>Average PFU/mL</b> |
|---------------------------------------------------------------------------------------------------------------------------------------------------------------------------|---------------------------|-----------------------|
| Planktonic time kill ( $10^6$ CFU/mL+ $10^5$ PFU/mL) <sup>1</sup>                                                                                                         | 0.1                       | $4 \cdot 10^6$        |
| Liquid (phage and bacteria, $10^7$ CFU/mL+ $10^6$ PFU/mL) <sup>2</sup>                                                                                                    | 0.1                       | $1.4 \cdot 10^8$      |
| Liquid culture (phage and bacteria, $10^7$ CFU/mL+ $10^7$ PFU/mL) <sup>3</sup>                                                                                            | 1                         | $3.4 \cdot 10^6$      |
| GSTSB (after biofilms are formed on the beads, $10^7$ of bacteria in biofilm CFU/mL+ $10^6$ PFU/mL) <sup>4</sup>                                                          | 0.1                       | $1.2 \cdot 10^7$      |
| GSTSB (after biofilms are formed on the beads, $10^7$ of bacteria in biofilm CFU/mL+ $10^7$ PFU/mL) <sup>5</sup>                                                          | 1                         | $9 \cdot 10^5$        |
| Biofilm-MHB<br>After biofilms are formed on the beads (24 h culture) and GSTSB is replaced with MHB ( $10^7$ of bacteria in biofilm CFU/mL+ $10^6$ PFU/mL) <sup>6</sup> . | 0.1                       | $5.2 \cdot 10^{10}$   |

<sup>1</sup>TKA plate well: 1.98 mL MHB + 20  $\mu$ L (MOI 0.1), incubate for 24 h in shaker incubator, aspirate 1 mL from well for phage propagation.

<sup>2</sup>Overnight liquid culture: 1 colony D712 into 3 mL HIB, incubate for 16-18 hours in shaker incubator, add 100  $\mu$ L of overnight culture and 20  $\mu$ L phage (MOI 0.1) to 9.88 mL MHB broth and incubate for 24 hours in shaker incubator, aspirate 1 mL for phage propagation.

<sup>3</sup>Overnight liquid culture: 1 colony D712 into 3 mL HIB, incubate for 16-18 hours in shaker incubator, add 100  $\mu$ L of overnight culture and 20  $\mu$ L phage (MOI 1) to 9.88 mL MHB broth and incubate, for 24 hours in shaker incubator, aspirate 1 mL for phage.

<sup>4</sup>TKA plate well: 1.98 mL TSB, incubate for 24 h, add 20  $\mu$ L phage (MOI 0.1), incubate for 24 h in shaker incubator, remove 1 mL from well for phage propagation.

<sup>5</sup>TKA plate well:

1.80 mL TSB, incubate for 24 h, add 200  $\mu$ L phage (MOI 1), incubate for 24 h in shaker incubator, remove 1 mL from well for phage propagation.

<sup>6</sup>TKA plate well: 2 mL TSB, incubate for 24 h, aspirate TSB and replace with 1.98 MHB, add 20  $\mu$ L phage (MOI 0.1), incubate x 24 hours in shaker incubator, aspirate 1 mL from well for phage propagation.

<sup>7</sup>Round HIB plate: add 100  $\mu$ L D712 overnight culture to 3 mL HIB overlay and pour over HIB plate, allow to dry for 10 minutes. Pour 400  $\mu$ L phage ( $10^9$  PFU/mL) over plate, incubate for 24 h, scrape lawn with T loop and place in 3 mL PBS buffer. Centrifuge for 2 min, remove and filter supernatant for phage propagation.

Abbreviations: GSTSB, glucose-supplemented tryptic soy broth; MHB, Mueller-Hinton broth
